# Supplementary material for: Evaluation of the Viral Diversity of Artemia Cysts from Saline Lakes in Kazakhstan Using Viral Metagenomics Analysis
Source: MDPI journal article supplement (doi:10.3390/fishes8100487), 2023-09-28
Supplement: s1 [file s1]

# Evaluation of the Viral Diversity of Artemia Cysts from Saline Lakes in Kazakhstan Using Viral Metagenomics Analysis

Marat Kumar <sup>1,2,\*</sup>, Kobey Karamendin <sup>1</sup>, Zhanara Mazhibayeva <sup>3</sup>, Yermukhammet Kassymbekov <sup>1</sup>, Temirlan Sabyrzhan <sup>1,2</sup>, Kuanysh Isbekov <sup>3</sup>, Saule Assylbekova <sup>3</sup> and Aidyn Kydyrmanov <sup>1,\*</sup>

(Supplementary Table S1)

Table S1. Information about the sampling location in the four regions (sampling site, coordination, temperature, salinity, sampling dates, and Aquatic organisms).

| Sampling site (Region, Lakes) |                  | Coordination               | Temp<br>°C  | Salinity<br>g/L | Sampling<br>Date | Aquatic organisms                                                                                                                             |
|-------------------------------|------------------|----------------------------|-------------|-----------------|------------------|-----------------------------------------------------------------------------------------------------------------------------------------------|
| North<br>Kazakhstan<br>Region | Pasynki Lake     | 54°47'18.0"N, 67°5'7.0"E   | 20,2 - 22,4 | 136,4           | 08/2022          | <i>Cletocamptus retrogressuss</i>                                                                                                             |
|                               | Smirnovka Lake   | 54°47'7.0"N, 68°22'26.0"E  | 18,0 - 22,0 | 107,0           | 08/2022          | <i>Cletocamptus retrogressus</i> , <i>Cyclopidae gen.sp.</i>                                                                                  |
|                               | Zhamantuz Lake   | 54°1'58.0"N, 69°14'28.0"E  | 17,5-19,8   | 89,7            | 08/2022          | <i>Cletocamptus retrogressuss</i>                                                                                                             |
|                               | Kalibek Lake     | 53°52'23.0"N, 70°37'40.0"E | 18,2 - 23,1 | 235,4           | 08/2022          |                                                                                                                                               |
| Pavlodar<br>Region            | Kyzyltuz Lake    | 53°47'20.0"N, 76°46'28.0"E | 22,0–24,2   | 288,0           | 08/2021          |                                                                                                                                               |
|                               | Ashchitakyr Lake | 52°33'27.0"N, 78°19'35.0"E | 21,5–23,0   | 79,9            | 08/2021          |                                                                                                                                               |
|                               | TuzKala Lake     | 51°52'38.0"N, 77°29'22.0"E | 22,0–23,7   | 236,0           | 08/2021          |                                                                                                                                               |
|                               | Kazy Lake        | 51°42'09.0"N, 78°03'34.9"E | 21,3–24,1   | 243,0           | 08/2021          |                                                                                                                                               |
| Almaty<br>Region              | Ray Lake         | 46°02'08.0"N, 78°08'45.0"E | 21,5-24,2   | 140,8           | 08/2022          | <i>Brachionus plicatilis</i> , <i>Hexarthra fennica</i> ,<br><i>Moina brachiate</i> , <i>Diaptomus sp.</i> , <i>Cletocamptus retrogressus</i> |
|                               | Tuzkol Lake      | 43°00'21.0"N, 79°59'27.0"E | 22,0-24,7   | 75,7            | 08/2022          | <i>Cletocamptus retrogressuss</i> , <i>Cyclopidae gen.sp.</i> ,<br><i>Diaptomidae gen.sp.</i>                                                 |
| Kyzylorda<br>Region           | Tushchybas Bay   | 46°15'00.0"N, 59°40'00.0"E | 23,6-27,4   | 72,3            | 08/2021          |                                                                                                                                               |
|                               | Chernyshev Bay   | 45°58'21.7"N, 59°16'05.6"E | 24,5-27,8   | 206,2           | 08/2021          |                                                                                                                                               |

(Supplementary Table S2)

Table S2: Overview of Sequencing Reads Classification at the Domain Level (DIAMOND Blastx and MEGAN-LCA).

| Domain of life | North_Kz<br>(Assigned<br>contigs No.) | Pavlodar<br>(Assigned<br>contigs No.) | Almaty<br>(Assigned<br>contigs No.) | Kyzylorda<br>(Assigned<br>contigs No.) |
|----------------|---------------------------------------|---------------------------------------|-------------------------------------|----------------------------------------|
| Bacteria       | 1251                                  | 2155                                  | 188                                 | 2448                                   |
| Archaea        | 78                                    | 216                                   | 0                                   | 23                                     |
| Eukaryota      | 2700                                  | 492                                   | 308                                 | 856                                    |
| Viruses        | 56                                    | 39                                    | 20                                  | 53                                     |
| Not Assigned   | 2310                                  | 1059                                  | 615                                 | 1452                                   |
| Total          | 6395                                  | 3961                                  | 1131                                | 4832                                   |

(Supplementary Figure S1)

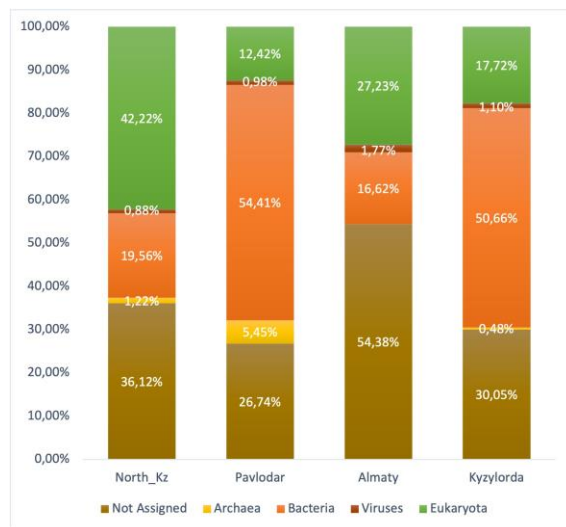

Figure S1. Proportion of the classification level of sequencing reads for different regions;based on DIAMOND blastx similarity search, followed by MEGAN-LCA binning to the classification level "domain".

| Table S3. Summary of the total count of viral readings obtained from 15 distinct viral families and unclassified viruses. |                                         |                       |                               |               | Sampling regions |          |        |           |
|---------------------------------------------------------------------------------------------------------------------------|-----------------------------------------|-----------------------|-------------------------------|---------------|------------------|----------|--------|-----------|
| Taxonomy Name                                                                                                             | Viral Genome                            | Classification        | Naturalhosts                  | Host          | North_KZ         | Pavlodar | Almaty | Kyzylorda |
| Autographiviridae                                                                                                         | Group I: dsDNA viruses                  | Bacteriophage         | Bacteria                      | Bacteria      | 2                | 0        | 0      | 0         |
| Myoviridae                                                                                                                | Group I: dsDNA viruses                  | Bacteriophage         | Bacteria                      | Bacteria      | 1                | 0        | 0      | 3         |
| Podoviridae                                                                                                               | Group I: dsDNA viruses                  | Bacteriophage         | Bacteria                      | Bacteria      | 0                | 0        | 0      | 1         |
| Straboviridae                                                                                                             | Group I: dsDNA viruses                  | Bacteriophage         | Bacteria                      | Bacteria      | 2                | 0        | 0      | 0         |
| Schitoviridae                                                                                                             | Group I: dsDNA viruses                  | Bacteriophage         | Bacteria                      | Bacteria      | 1                | 0        | 0      | 0         |
| Zobellviridae                                                                                                             | Group I: dsDNA viruses                  | Bacteriophage         | Bacteria                      | Bacteria      | 2                | 0        | 0      | 0         |
| unclassified<br>Caudovirales                                                                                              | Group I: dsDNA viruses                  | Bacteriophage         | Bacteria                      | Bacteria      | 8                | 2        | 2      | 14        |
| Tombusviridae                                                                                                             | Group IV: ssRNA positive-strand viruses | Plant viruses         | Plant                         | Plant         | 0                | 0        | 4      | 0         |
| Solemoviridae                                                                                                             | Group IV: ssRNA positive-strand viruses | Plant viruses         | Plant                         | Plant         | 0                | 0        | 1      | 0         |
| Picornaviridae                                                                                                            | Group IV: ssRNA positive-strand viruses | Vertebrates viruses   | Vertebrates                   | Vertebrates   | 0                | 2        | 0      | 0         |
| Astroviridae                                                                                                              | Group IV: ssRNA positive-strand viruses | Vertebrates viruses   | Vertebrates                   | Vertebrates   | 0                | 0        | 2      | 0         |
| Reoviridae                                                                                                                | Group III: dsRNA viruses                | Unclear               | Vertebrates-<br>Invertebrates | Invertebrates | 26               | 14       | 0      | 0         |
| Nodaviridae                                                                                                               | Group IV: ssRNA positive-strand viruses | Invertebrates viruses | Vertebrates-<br>Invertebrates | Invertebrates | 2                | 0        | 0      | 0         |
| Dicistroviridae                                                                                                           | Group IV: ssRNA positive-strand viruses | Insect viruses        | Invertebrates                 | Invertebrates | 0                | 3        | 4      | 0         |
| unclassified<br>viruses                                                                                                   | Unclear                                 | Unclassified          | Unclear                       | Unclear       | 0                | 3        | 5      | 1         |

**Table S4: Overview of contigs of Bacteriophage species identified using BLASTx in Artemia cysts collected from four regions.**

| No. | region    | coverage | length | bitscore | ident | length.1 | stitle                                                                                                                   | qlen | staxid  | species                            | genus            | family            | order   | class          | phylum      | superkingdom  |
|-----|-----------|----------|--------|----------|-------|----------|--------------------------------------------------------------------------------------------------------------------------|------|---------|------------------------------------|------------------|-------------------|---------|----------------|-------------|---------------|
| 1   | North_Kz  | 2        | 569    | 124      | 61.9  | 97       | YP_009800545.1 terminase large subunit [Pseudomonas phage Njord]                                                         | 569  | 2163985 | Uliginivirus njord                 | Uliginivirus     | Autographiviridae | unknown | Caudoviricetes | Uroviricota | Bacteriophage |
| 2   | North_Kz  | 2        | 390    | 161      | 65.6  | 125      | UJH95814.1 major capsid protein [Pantoea phage Nifs112]                                                                  | 390  | 2894289 | Pantoea phage Nifs112              | Eracentumvirus   | Autographiviridae | unknown | Caudoviricetes | Uroviricota | Bacteriophage |
| 3   | North_Kz  | 2        | 358    | 137      | 64.9  | 111      | WAI96127.1 portal protein [Vibrio phage vB_VhaP_PG11]                                                                    | 358  | 2996149 | Vibrio phage vB_VhaP_PG11          | unknown          | Schitoviridae     | unknown | Caudoviricetes | Uroviricota | Bacteriophage |
| 4   | North_Kz  | 2        | 356    | 196      | 74.4  | 117      | YP_010090488.1 NrdA-like aerobic NDP reductase large subunit [Pseudomonas phage PspYZU05]                                | 356  | 1983556 | Jiangsuivirus pspyzu05             | Jiangsuivirus    | Straboviridae     | unknown | Caudoviricetes | Uroviricota | Bacteriophage |
| 5   | North_Kz  | 2        | 327    | 132      | 63.8  | 94       | QPI18018.1 ribonucleotide reductase large subunit [Pectobacterium phage POP12]                                           | 327  | 2741065 | Pectobacterium phage POP12         | unknown          | Straboviridae     | unknown | Caudoviricetes | Uroviricota | Bacteriophage |
| 6   | North_Kz  | 1        | 419    | 278      | 92.1  | 139      | YP_007010563.1 DNA packaging enzyme (terminase) [Salinivibrio phage CW02]                                                | 419  | 1161935 | Salinivirus utanense               | Salinivirus      | Zobellviridae     | unknown | Caudoviricetes | Uroviricota | Bacteriophage |
| 7   | North_Kz  | 2        | 378    | 215      | 81.5  | 124      | YP_007010534.1 DNA polymerase [Salinivibrio phage CW02]                                                                  | 378  | 1161935 | Salinivirus utanense               | Salinivirus      | Zobellviridae     | unknown | Caudoviricetes | Uroviricota | Bacteriophage |
| 8   | North_Kz  | 2        | 348    | 202      | 86.1  | 115      | ASV44548.1 thymidine kinase-like protein [Salicola phage SCTP-2]                                                         | 348  | 2015814 | Salicola phage SCTP-2              | unknown          | Myoviridae        | unknown | Caudoviricetes | Uroviricota | Bacteriophage |
| 9   | North_Kz  | 2        | 363    | 208      | 90.1  | 111      | AUV61410.1 small terminase [Pontimonas phage phiPsal1]                                                                   | 363  | 2079347 | Pontimonas phage phiPsal1          | unknown          | unknown           | unknown | Caudoviricetes | Uroviricota | Bacteriophage |
| 10  | North_Kz  | 2        | 410    | 199      | 73.5  | 136      | APC44505.1 hypothetical protein [Pseudoalteromonas phage PH357]                                                          | 410  | 1913046 | Pseudoalteromonas phage PH357      | Qingdaovirus     | unknown           | unknown | Caudoviricetes | Uroviricota | Bacteriophage |
| 11  | North_Kz  | 2        | 366    | 141      | 70.5  | 88       | YP_009595559.1 major head protein [Pseudomonas phage pf16]                                                               | 366  | 1815630 | Chakrabartyvirus pf16              | Chakrabartyvirus | unknown           | unknown | Caudoviricetes | Uroviricota | Bacteriophage |
| 12  | North_Kz  | 2        | 522    | 229      | 64.7  | 173      | YP_009595646.1 DNA topoisomerase II [Pseudomonas phage pf16]                                                             | 522  | 1815630 | Chakrabartyvirus pf16              | Chakrabartyvirus | unknown           | unknown | Caudoviricetes | Uroviricota | Bacteriophage |
| 13  | North_Kz  | 3        | 338    | 144      | 64.2  | 109      | YP_009595528.1 DNA polymerase [Pseudomonas phage pf16]                                                                   | 338  | 1815630 | Chakrabartyvirus pf16              | Chakrabartyvirus | unknown           | unknown | Caudoviricetes | Uroviricota | Bacteriophage |
| 14  | North_Kz  | 2        | 535    | 211      | 60.2  | 176      | CAB4157494.1 GP4d_helicase domain containing protein [uncultured Caudovirales phage]                                     | 535  | 2100421 | uncultured Caudovirales phage      | unknown          | unknown           | unknown | Caudoviricetes | Uroviricota | Bacteriophage |
| 15  | North_Kz  | 2        | 349    | 122      | 58    | 112      | WAX23091.1 tail sheath protein [Vibrio phage 13VT501A]                                                                   | 349  | 3003693 | Vibrio phage 13VT501A              | unknown          | unknown           | unknown | Caudoviricetes | Uroviricota | Bacteriophage |
| 16  | North_Kz  | 2        | 365    | 129      | 51.5  | 130      | UGV20061.1 DNA polymerase [Salmonella phage ph2-2]                                                                       | 365  | 2900271 | Salmonella phage ph2-2             | Felixovavirus    | unknown           | unknown | Caudoviricetes | Uroviricota | Bacteriophage |
| 17  | Pavlodar  | 4.6083   | 1397   | 124      | 73.3  | 86       | DAF34309.1 MAG TPA: hypothetical protein [Caudoviricetes sp.]                                                            | 1397 | 2832643 | Caudoviricetes sp.                 | unknown          | unknown           | unknown | Caudoviricetes | Uroviricota | Bacteriophage |
| 18  | Pavlodar  | 2.2209   | 829    | 137      | 81.9  | 83       | DAF34309.1 MAG TPA: hypothetical protein [Caudoviricetes sp.]                                                            | 829  | 2832643 | Caudoviricetes sp.                 | unknown          | unknown           | unknown | Caudoviricetes | Uroviricota | Bacteriophage |
| 19  | Almaty    | 1        | 367    | 163      | 83.5  | 97       | DAK91763.1 MAG TPA: hypothetical protein, partial [Caudoviricetes sp.]                                                   | 367  | 2832643 | Caudoviricetes sp.                 | unknown          | unknown           | unknown | Caudoviricetes | Uroviricota | Bacteriophage |
| 20  | Almaty    | 1        | 349    | 140      | 66.1  | 115      | CAB4154309.1 tape_meas_TP901, phage tail tape measure protein, TP901 family, core region [uncultured Caudovirales phage] | 349  | 2100421 | uncultured Caudovirales phage      | unknown          | unknown           | unknown | Caudoviricetes | Uroviricota | Bacteriophage |
| 21  | Kyzylorda | 1        | 412    | 190      | 78    | 123      | ATV46261.1 major capsid protein [Lake Baikal phage Baikal-20-5m-C28]                                                     | 412  | 2047876 | Lake Baikal phage Baikal-20-5m-C28 | unknown          | Myoviridae        | unknown | Caudoviricetes | Uroviricota | Bacteriophage |
| 22  | Kyzylorda | 2        | 331    | 159      | 74.8  | 103      | AUR89446.1 P-loop containing nucleoside triphosphate hydrolase [Vibrio phage 1.123.O_10N.286.48.F3]                      | 331  | 2070727 | Vibrio phage 1.123.O_10N.286.48.F3 | unknown          | Myoviridae        | unknown | Caudoviricetes | Uroviricota | Bacteriophage |
| 23  | Kyzylorda | 2        | 334    | 124      | 69.5  | 95       | ATV46261.1 major capsid protein [Lake Baikal phage Baikal-20-5m-C28]                                                     | 334  | 2047876 | Lake Baikal phage Baikal-20-5m-C28 | unknown          | Myoviridae        | unknown | Caudoviricetes | Uroviricota | Bacteriophage |
| 24  | Kyzylorda | 3        | 523    | 166      | 66.4  | 119      | YP_009009736.1 anti-repressor Ant [Vibrio phage PVA1]                                                                    | 523  | 1461743 | Vibrio phage PVA1                  | unknown          | Podoviridae       | unknown | Caudoviricetes | Uroviricota | Bacteriophage |

|    |               |   |     |     |      |     |                                                                                                                 |     |         |                                     |              |         |         |                |             |               |
|----|---------------|---|-----|-----|------|-----|-----------------------------------------------------------------------------------------------------------------|-----|---------|-------------------------------------|--------------|---------|---------|----------------|-------------|---------------|
| 25 | Kyzylord<br>a | 2 | 421 | 173 | 84.2 | 101 | QJG62451.1 terminase large subunit [Pseudoalteromonas phage AL]                                                 | 421 | 2712933 | Pseudoalteromonas phage AL          | unknown      | unknown | unknown | Caudoviricetes | Uroviricota | Bacteriophage |
| 26 | Kyzylord<br>a | 1 | 409 | 232 | 83.8 | 136 | YP_009810889.1 ribonucleoside-diphosphate reductase large subunit [Synechococcus phage S-T4]                    | 409 | 2268578 | Tamkungvirus ST4                    | Tamkungvirus | unknown | unknown | Caudoviricetes | Uroviricota | Bacteriophage |
| 27 | Kyzylord<br>a | 2 | 313 | 165 | 81.7 | 104 | QEG08956.1 P22 coat-protein S family protein [Aeromonas phage 4_4512]                                           | 313 | 2588516 | Aeromonas phage 4_4512              | unknown      | unknown | unknown | Caudoviricetes | Uroviricota | Bacteriophage |
| 28 | Kyzylord<br>a | 2 | 466 | 260 | 80.6 | 155 | UUW39915.1 putative DNA polymerase II [Vibrio phage VPMCC14]                                                    | 466 | 2968382 | Vibrio phage VPMCC14                | unknown      | unknown | unknown | Caudoviricetes | Uroviricota | Bacteriophage |
| 29 | Kyzylord<br>a | 2 | 456 | 241 | 79.6 | 152 | CAB4125971.1 clpA ATP-binding subunits of Clp protease and DnaK/DnaJ chaperones [uncultured Caudovirales phage] | 456 | 2100421 | uncultured Caudovirales phage       | unknown      | unknown | unknown | Caudoviricetes | Uroviricota | Bacteriophage |
| 30 | Kyzylord<br>a | 1 | 432 | 140 | 75   | 92  | AUR95823.1 ERF superfamily protein [Vibrio phage 1.213.O_10N.222.54.F10]                                        | 432 | 1881410 | Vibrio phage 1.213.O_10N.222.54.F10 | unknown      | unknown | unknown | Caudoviricetes | Uroviricota | Bacteriophage |
| 31 | Kyzylord<br>a | 2 | 341 | 157 | 74.6 | 114 | AUR92199.1 coil containing protein [Vibrio phage 1.170.O_10N.261.52.C3]                                         | 341 | 1881390 | Vibrio phage 1.170.O_10N.261.52.C3  | unknown      | unknown | unknown | Caudoviricetes | Uroviricota | Bacteriophage |
| 32 | Kyzylord<br>a | 3 | 479 | 121 | 73.3 | 86  | UAW58936.1 putative tail fiber protein [Roseobacter phage CRP-207]                                              | 479 | 2873404 | Roseobacter phage CRP-207           | unknown      | unknown | unknown | Caudoviricetes | Uroviricota | Bacteriophage |
| 33 | Kyzylord<br>a | 3 | 693 | 225 | 71.8 | 142 | DAJ54684.1 MAG TPA: DNA repair protein-like protein [Caudoviricetes sp.]                                        | 693 | 2832643 | Caudoviricetes sp.                  | unknown      | unknown | unknown | Caudoviricetes | Uroviricota | Bacteriophage |
| 34 | Kyzylord<br>a | 2 | 427 | 129 | 71.1 | 90  | CAB4143225.1 hypothetical protein UFOVP449_138 [uncultured Caudovirales phage]                                  | 427 | 2100421 | uncultured Caudovirales phage       | unknown      | unknown | unknown | Caudoviricetes | Uroviricota | Bacteriophage |
| 35 | Kyzylord<br>a | 2 | 443 | 213 | 70.7 | 150 | WAX23081.1 major capsid protein [Vibrio phage 13VT501A]                                                         | 443 | 3003693 | Vibrio phage 13VT501A               | unknown      | unknown | unknown | Caudoviricetes | Uroviricota | Bacteriophage |
| 36 | Kyzylord<br>a | 2 | 454 | 122 | 70.6 | 85  | WAX23101.1 hypothetical protein pA_gene0060 [Vibrio phage 13VT501A]                                             | 454 | 3003693 | Vibrio phage 13VT501A               | unknown      | unknown | unknown | Caudoviricetes | Uroviricota | Bacteriophage |
| 37 | Kyzylord<br>a | 1 | 405 | 122 | 70.3 | 91  | CAB5221546.1 hypothetical protein UFOVP240_190 [uncultured Caudovirales phage]                                  | 405 | 2100421 | uncultured Caudovirales phage       | unknown      | unknown | unknown | Caudoviricetes | Uroviricota | Bacteriophage |
| 38 | Kyzylord<br>a | 3 | 405 | 147 | 68.4 | 98  | CAB4133809.1 COG0720 6-pyruvoyl-tetrahydropterin synthase [uncultured Caudovirales phage]                       | 405 | 2100421 | uncultured Caudovirales phage       | unknown      | unknown | unknown | Caudoviricetes | Uroviricota | Bacteriophage |
